# Supplementary material
Source: PubMed Central journal article supplement (PMC5025281)
Supplement: NIHMS4098-supplement-1.pdf [file NIHMS4098-supplement-1.pdf]

## SUPPLEMENTARY FIGURE LEGENDS

### **Supp. Figure 1: Nodal promotes invasion and migration in MCF7 breast cancer cells.** (A)

MCF7 cells were seeded in Transwell chambers and treated with 0, 50 or 100 ng/mL of rhNodal for 24 hours to assess cellular migration. Cells exhibited a significant dose-dependent up-regulation of cellular migration in response to rhNodal (n=4, p<0.05). (B) MCF7 cells were seeded in Matrigel-coated Transwell chambers and treated with 0, 50 or 100 ng/mL of rhNodal for 24 hours to assess cellular invasion. Cells exhibited a significant up-regulation of cellular invasion at 100 ng/mL rhNodal (n=3, p=0.004).

### **Supp. Figure 2: Nodal promotes EMT-like phenotypes in breast cancer cell lines.** (A)

Real time RT-PCR analysis of EMT markers in MCF7 cells treated with 0, 50 or 100 ng/mL of rhNodal for 48 hours. 100 ng/mL Nodal caused a decrease in *ESR1* expression (n=5, p=0.008), and an increase in *TWIST1* (n=5, p=0.036) and *VIM* expression (n=5, p=0.008) compared to untreated cells. *CDH2* (*N-Cadherin*) and *CDH1* (*E-Cadherin*) expression did not change (n=5, p>0.05). (B) Real time RT-PCR analysis of EMT markers in T47D cells treated with 0, 50 or 100 ng/mL of rhNodal for 48 hours. 100 ng/mL Nodal caused a decrease in *ESR1* expression (n=4, p=0.029), and an increase in *TWIST1* (n=4, p=0.029) and *VIM* expression (n=4, p=0.02) compared to untreated cells. *CDH2* and *CDH1* expression did not change (n=4, p>0.05). (C) Immunofluorescence (IF) showing localization of E-Cadherin (green) in MCF7 cells or (D) T47D cells treated with 0, 50 or 100 ng/mL of rhNodal for 48 hours. Nuclei are stained with DAPI (blue) and bars equal 20  $\mu$ m. All IF was performed  $\geq 3$  times. Data in A and B are presented as mean  $\pm$  S.E.M. for replicate values. Asterisks (\*) indicate a significant difference compared to control cells as specified. Expression levels are normalized to *HPRT1*.

**Supp. Figure 3: Densitometric analysis of pERK1/2 in cells expressing Nodal ± the ALK4/5/7 inhibitor SB431542.** Densitometric analysis for all replicate experiments corresponding to Figure 3E (A) and 3F (B). ImageJ was used to calculate band density of P-ERK1/2 relative to total ERK1/2. Data are presented as mean fold change ± S.E.M. Different letters indicate a significant difference compared to controls (n=4, p<0.05).

**Supp. Figure 4: Cripto, ALK4 and ALK7 levels in breast cancer and choriocarcinoma cells.** (A) RT-PCR and real time RT-PCR (B) analyses of *Cripto*, *ALK4* and *ALK7* mRNA expression levels in T47D+EV, T47D+Nodal, BwWo+EV, BeWo+Nodal, MDA-MB-31+shControl and MDA-MB-231+shNodal cells. All cell lines transcribe these members of the Nodal receptor complex and alterations in Nodal expression variably affect receptor expression in a cell type, and transcript dependent manner. *HPRT1* is used as a loading control in (A). Expression levels in B are normalized to *RPLPO*.

**Supp. Figure 5: Nodal-induced invasion and migration in MCF-7 cells is dependent on active ERK signaling.** (A) MCF-7 cellular invasion through a Matrigel-coated Transwell chamber increased in response to 100 ng/mL rhNodal (n=3, p=0.005), and this effect was mitigated by the addition of 10 µM U0126. (B) MCF-7 cellular migration through a Transwell chamber (without Matrigel) increased in response to 100 ng/mL rhNodal (n=3, p=0.005), and this effect was mitigated by the addition of 10 µM U0126. (C) MCF-7 viability assay demonstrating equal cell viability after 24 hours between treatments corresponding to (A) and (B). Data are presented as mean ± S.E.M. for replicate values. Different letters indicate a significant difference as specified.

**Supp. Figure 6: Nodal-induced EMT in MCF-7 cells is dependent on active ERK signaling.**

(A) Real time RT-PCR analysis of EMT markers in MCF-7 cells exposed to 100 ng/mL rhNodal alone, or 100 ng/mL rhNodal + 10  $\mu$ M U0126 (48 hours). In response to 100 ng/mL of Nodal, MCF-7 cells displayed a decrease in *ESR1* expression (n=5, p=0.008), and an increase in *TWIST1* (n=5, p=0.036) and *VIM* expression (n=5, p=0.008) compared to controls. *CDH2* and *CDH1* expression did not change (n=5, p>0.05). Treatment of MCF-7 cells with U0126 prior to treatment with rhNodal rescued *TWIST1* and *VIM* expression back to control levels, but did not rescue *ESR1* expression (n=5, p<0.001). All PCR data are presented as mean  $\pm$  S.E.M. for replicate values. Different letters indicate a significant difference compared to control treatments/genes as specified. (B) Immunofluorescence (IF) showing localization of E-Cadherin (green) in MCF-7 cells treated with 100 ng/mL rhNodal, or 100 ng/mL rhNodal + 10  $\mu$ M U0126 (compared to vehicle controls). Nuclei are stained with DAPI (blue) and bars equal 20  $\mu$ m. All IF was performed 3-4 times.

**Supp. Figure 7: Inhibition of the Nodal type 1 receptor in aggressive Hs578t breast cancer cells causes reduced invasion and migration *in vitro*.**

(A) Hs578t cellular invasion through a Matrigel-coated Transwell chamber was reduced in response to 1-10  $\mu$ M SB431542 (n=5, p<0.05) compared to vehicle controls. (B) Hs578t cellular migration through a Transwell chamber (without Matrigel) was reduced in response to 1-10  $\mu$ M SB431542 (n=5, p<0.001) compared to vehicle controls. Data are presented as mean  $\pm$  S.E.M. for replicate values. Different letters indicate a significant difference as specified.

# Quail, Supplementary Figure 1.

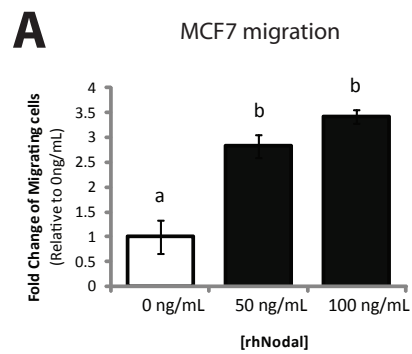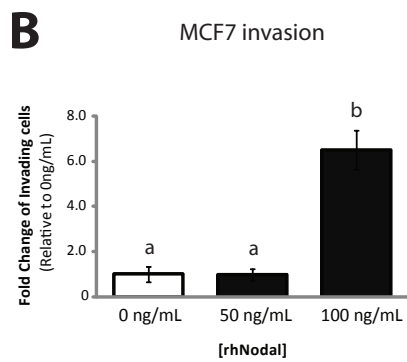

# Quail, Supplementary Figure 2

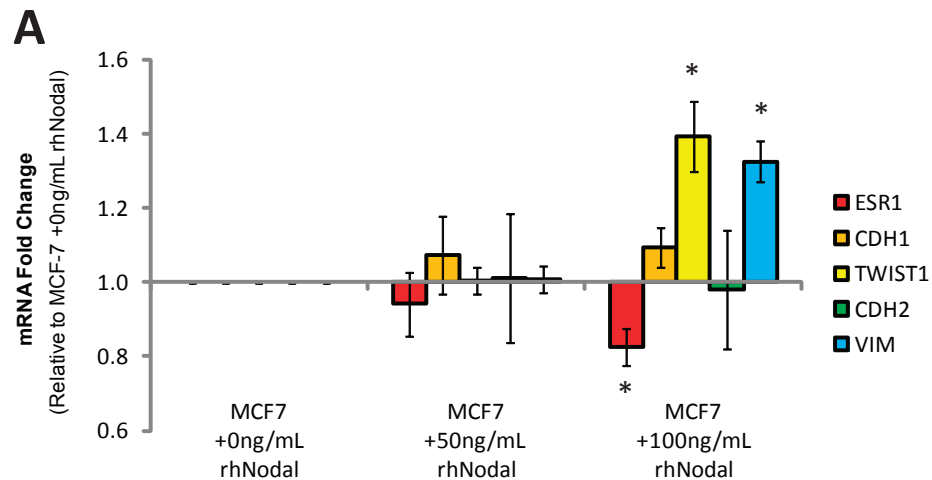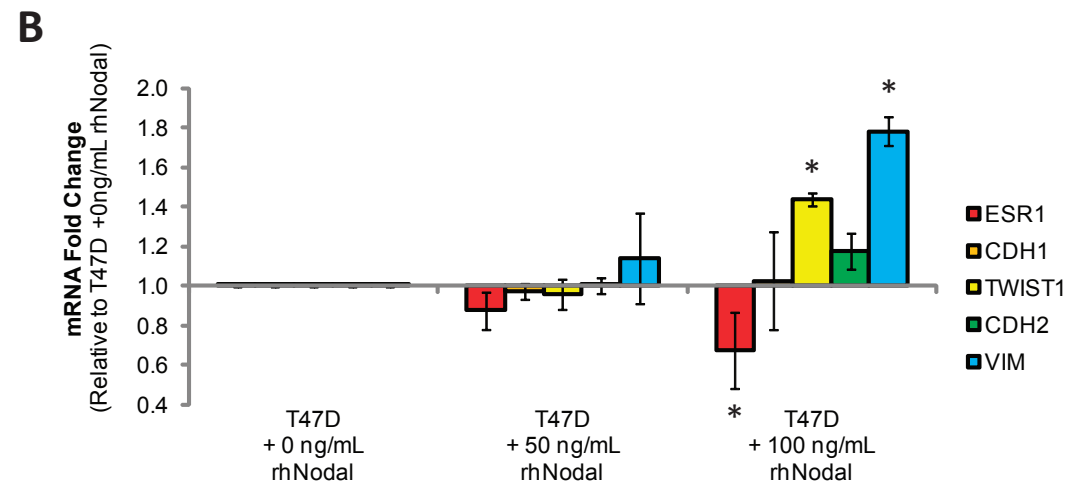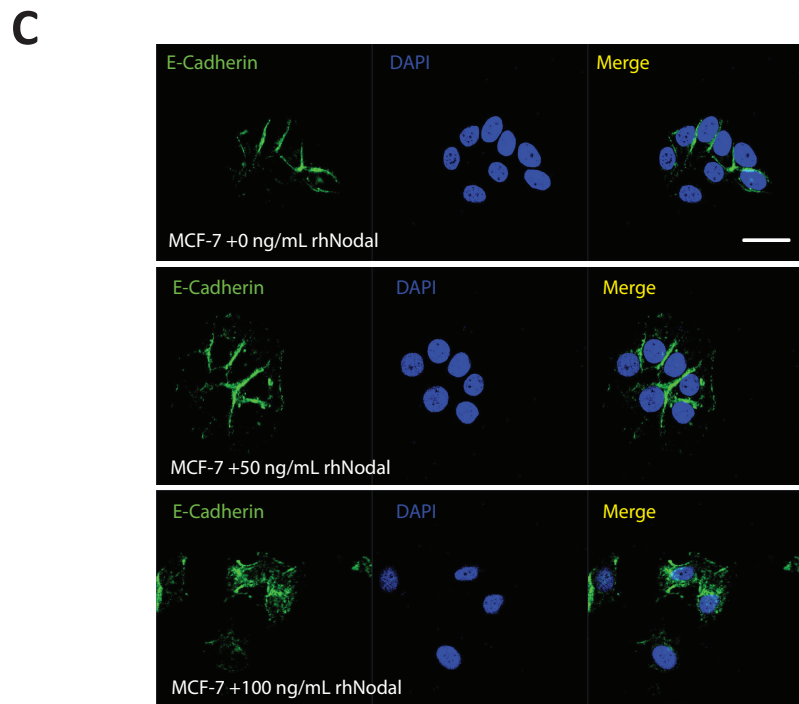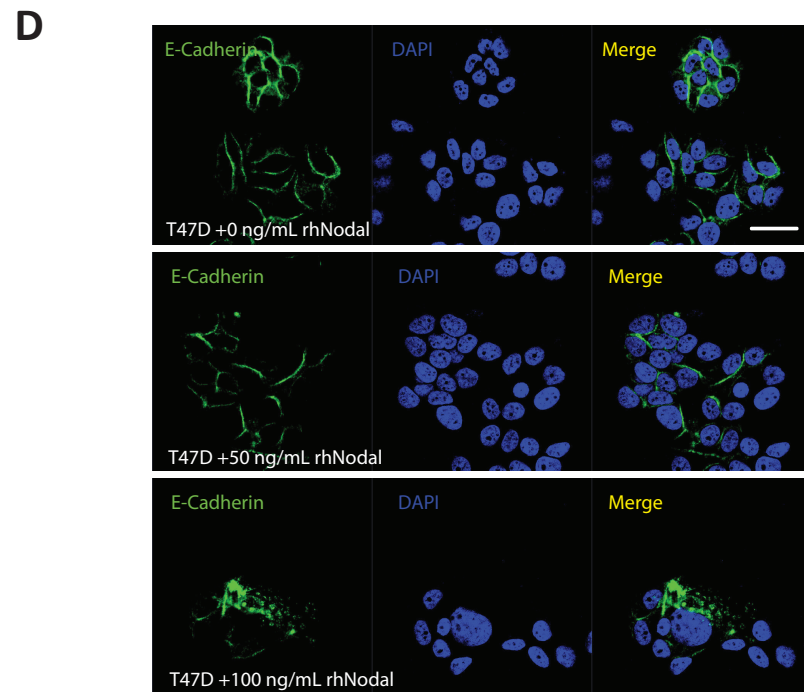

# Quail, Supplementary Figure 3

**A**

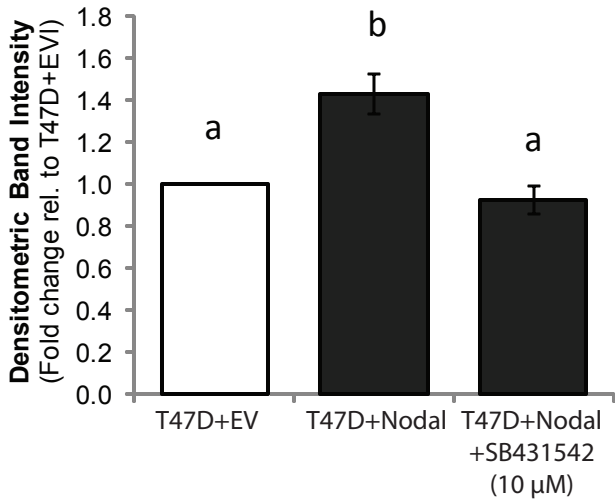

**B**

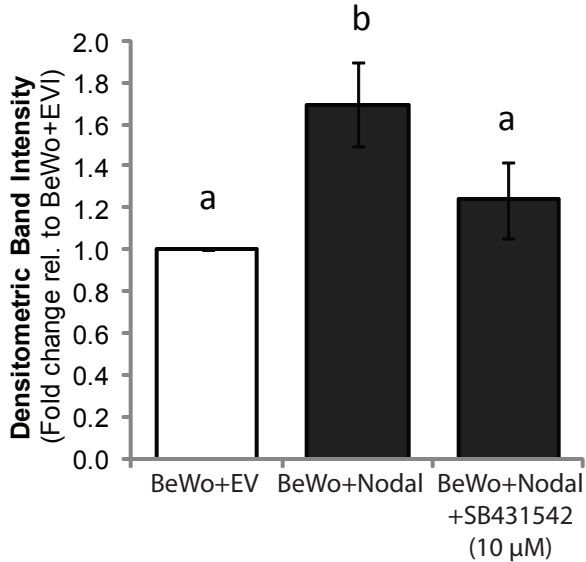

# Quail, Supplementary Figure 4

**A**

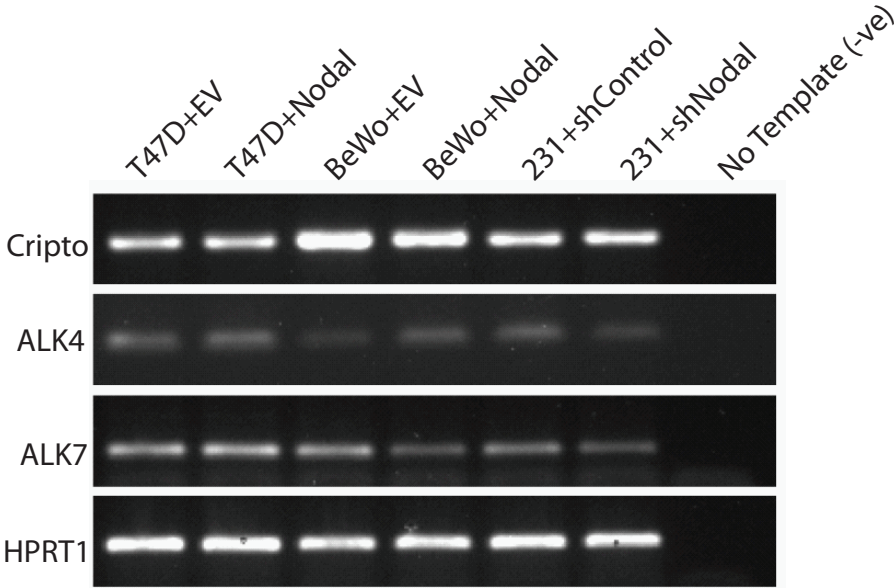

**B**

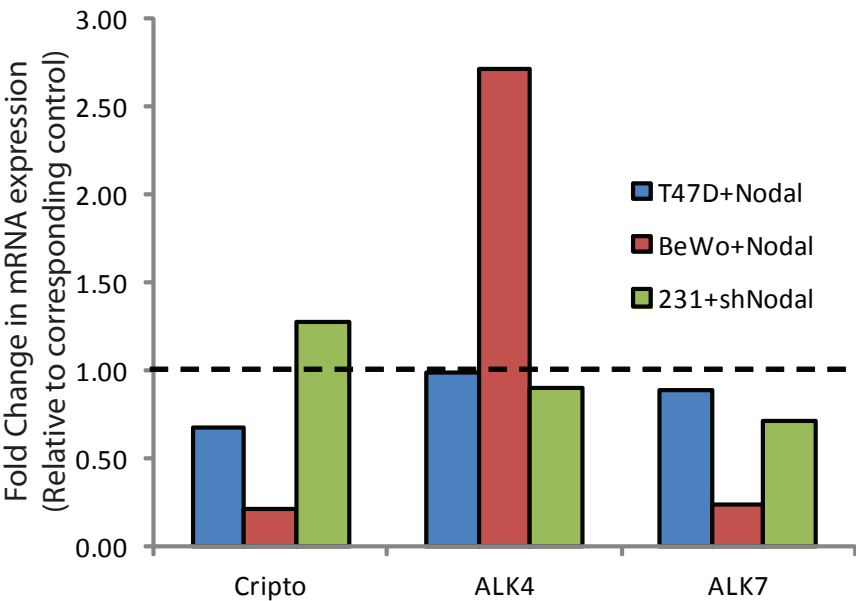

# Quail, Supplementary Figure 5

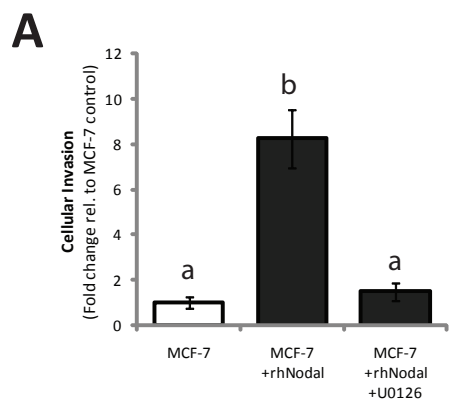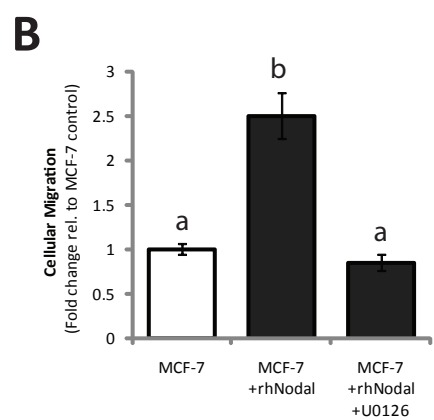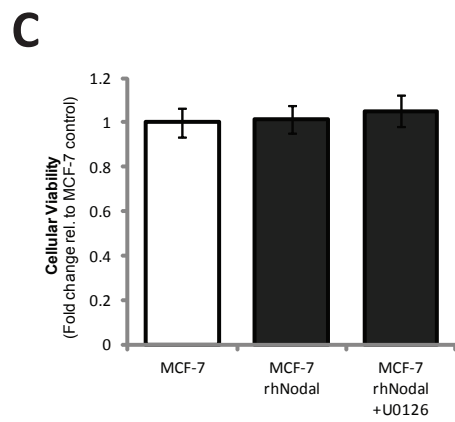



# Quail, Supplementary Figure 6

## A

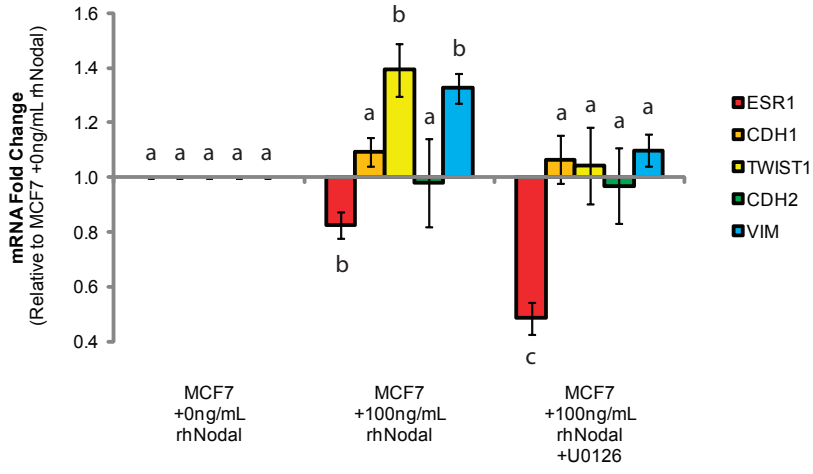

## B

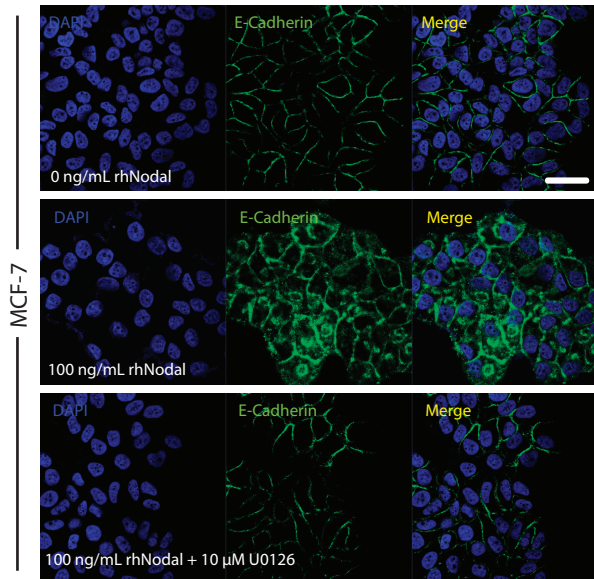

# Quail, Supplementary Figure 7

**A** Hs578t cells

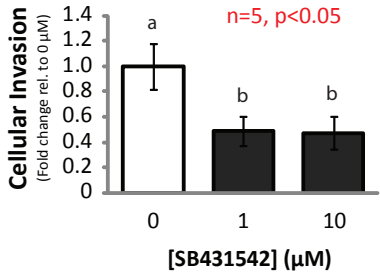

**B** Hs578t cells

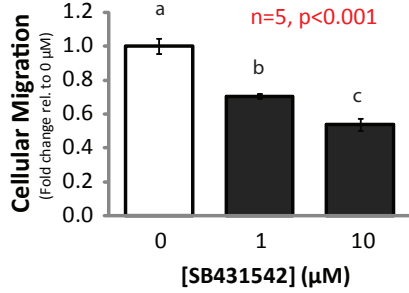

| <b>Primary Antibody</b>                | <b>Clone</b> | <b>Company</b>  | <b>Dilution &amp; Use</b> |
|----------------------------------------|--------------|-----------------|---------------------------|
| Monoclonal mouse anti-Nodal            | WS65         | Santa Cruz      | 1:500 WB                  |
| Monoclonal mouse anti-hNodal           | 5C3          | AbCam           | 1:500 IHC                 |
| Monoclonal rabbit anti-phospho-SMAD2   | A5S          | Millipore       | 1:1000 WB                 |
| Polyclonal rabbit anti-SMAD2/3         |              | Millipore       | 1:1000 WB                 |
| Monoclonal mouse anti- $\beta$ -Actin  | C4           | Santa Cruz      | 1:5000 WB                 |
| Monoclonal rabbit anti-E-Cadherin      | 24E10        | Cell Signalling | 1:1000 WB<br>1:100 IF     |
| Polyclonal rabbit anti-p44/42 (ERK1/2) |              | Cell Signalling | 1:1000 WB                 |
| Monoclonal mouse anti-p44/42 (ERK1/2)  | E10          | Cell Signalling | 1:1000 WB                 |
| Polyclonal rabbit anti-N-Cadherin      |              | Cell Signalling | 1:1000 WB                 |
| Monoclonal rabbit anti-Vimentin        | D21H3        | Cell Signalling | 1:1000 WB                 |
| Monoclonal mouse anti-Twist            | Twist2C1a    | AbCam           | 1:1000 WB                 |

**Supplementary Table 1: Primary antibodies used for Western blot (WB), Immunofluorescence (IF) and Immunohistochemistry (IHC).**

| <b>Gene</b>              | <b>ID</b>       |
|--------------------------|-----------------|
| CDH1 (E-Cadherin)        | Hs00170423_A1   |
| ESR1 (Estrogen Receptor) | Hs00174860_A1   |
| TWIST1                   | Hs01675818_S1   |
| CDH2 (N-Cadherin)        | Hs00983056_m1   |
| VIM (Vimentin)           | Hs00185584_A1   |
| ALK-4 (ACVR1B)           | Hs00244715_m1   |
| ALK-7 (ACVR1C)           | Hs00377065_m1   |
| Cripto-1                 | Hs02339499_g1   |
| RPLPO                    | 4333761-0707014 |
| HPRT1                    | 4333768-0904021 |

**Supplementary Table 2: Primer/Probes used for real-time PCR (Applied Biosystems/Invitrogen).**
